# Supplementary material for: Surgical management of chronic lateral ankle instability: a meta-analysis
Source: PubMed Central journal article supplement (PMC6019311; doi:10.1186/s13018-018-0870-6), 2018-06-25
Supplement: 13018_2018_870_MOESM2_ESM.pdf [file 13018_2018_870_MOESM2_ESM.pdf]

## Characteristics of studies

### Characteristics of included studies

#### Cho 2012

|                      |                                                                                                                                                                                                                                                                                                                                                                                                                                                                                                                                                                                                                                                                                                                                                                                                                                                                                                                                                                                                                  |
|----------------------|------------------------------------------------------------------------------------------------------------------------------------------------------------------------------------------------------------------------------------------------------------------------------------------------------------------------------------------------------------------------------------------------------------------------------------------------------------------------------------------------------------------------------------------------------------------------------------------------------------------------------------------------------------------------------------------------------------------------------------------------------------------------------------------------------------------------------------------------------------------------------------------------------------------------------------------------------------------------------------------------------------------|
| <b>Methods</b>       | <p>Location: Chungbuk National University Hospital</p> <p>Design: Prospective Randomised Trial</p> <p>Method of randomisation: Table of random numbers</p> <p>Assessor blinding: Not mentioned</p> <p>Study period: Not mentioned</p> <p>Follow-up: More than 2 years</p> <p>Intention-to-treat: Assumed a 20% dropout-rate preoperation and analyzed data when each group had 20 eligible patients.</p>                                                                                                                                                                                                                                                                                                                                                                                                                                                                                                                                                                                                         |
| <b>Participants</b>  | <p>Transosseous suture group: 12 males and 8 females, Suture anchor group: 11 males and 9 females</p> <p>Mean age of the patients: 33.9 (range, 21 to 42) years in the transosseous suture group; 30.7 (range, 15 to 44) years in the suture anchor group.</p> <p>Inclusion criteria (1+2+3/4):</p> <p>(1) patients who complained of subjective instability of the ankle joint in whom repeated sprain injuries for more than 6 months and pain were confirmed;</p> <p>(2) patients with marked ankle instability confirmed by the anterior drawer test compared with the contralateral ankle and tenderness involving the lateral ligaments of the ankle confirmed on physical examination;</p> <p>(3) patients with a talar tilt angle exceeding 10 degrees or a discrepancy of more than 5 degrees compared with the non-affected side on stress radiography;</p> <p>(4) patients with an anterior talar translation exceeding 10 mm or a discrepancy more than 3 mm compared with the nonaffected side.</p> |
| <b>Interventions</b> | <p>Two methods of ankle ligament reconstruction:</p> <p>(1) Suture Anchor for the Modified Brostrom Procedure</p> <p>(2) Transosseous Suture for the Modified Brostrom Procedure</p>                                                                                                                                                                                                                                                                                                                                                                                                                                                                                                                                                                                                                                                                                                                                                                                                                             |
| <b>Outcomes</b>      | <p>(1) Karlsson score</p> <p>(2) Sefton grading system</p> <p>(3) Anterior talar translation and talar tilt angle (preoperative and postoperative)</p> <p>(4) Intraoperative and postoperative complications: drill hole fracture, breakage of the anchor, wound complications and nerve damage</p>                                                                                                                                                                                                                                                                                                                                                                                                                                                                                                                                                                                                                                                                                                              |
| <b>Notes</b>         |                                                                                                                                                                                                                                                                                                                                                                                                                                                                                                                                                                                                                                                                                                                                                                                                                                                                                                                                                                                                                  |

#### Risk of bias table

| Bias                                                      | Authors' judgement | Support for judgement                                              |
|-----------------------------------------------------------|--------------------|--------------------------------------------------------------------|
| Random sequence generation (selection bias)               | Low risk           | Patients were randomly assigned based on a table of random numbers |
| Allocation concealment (selection bias)                   | Unclear risk       | Allocation concealment not mentioned                               |
| Blinding of participants and personnel (performance bias) | Unclear risk       | Blinding not mentioned                                             |
| Blinding of outcome assessment (detection bias)           | Unclear risk       | Blinding not mentioned                                             |
| Incomplete outcome data (attrition bias)                  | Low risk           | Assumed dropout-rate preoperation, probably no data lost           |
| Selective reporting (reporting bias)                      | Low risk           | Outcome measures the same in methods and results sections          |

---

|            |              |                                                                                 |
|------------|--------------|---------------------------------------------------------------------------------|
| Other bias | Unclear risk | There was insufficient information to judge the risk from other sources of bias |
|------------|--------------|---------------------------------------------------------------------------------|

*Footnotes*
