# Supplementary material for: Surgical management of chronic lateral ankle instability: a meta-analysis
Source: PubMed Central journal article supplement (PMC6019311; doi:10.1186/s13018-018-0870-6), 2018-06-25
Supplement: 13018_2018_870_MOESM3_ESM.pdf [file 13018_2018_870_MOESM3_ESM.pdf]

## Characteristics of studies

### Characteristics of included studies

#### Cho 2013

|                      |                                                                                                                                                                                                                                                                                                                                                                                                                                                                                                                                                                                                                                                                                                                                                                                                                                                                                                                                                                                                                                                                                                 |
|----------------------|-------------------------------------------------------------------------------------------------------------------------------------------------------------------------------------------------------------------------------------------------------------------------------------------------------------------------------------------------------------------------------------------------------------------------------------------------------------------------------------------------------------------------------------------------------------------------------------------------------------------------------------------------------------------------------------------------------------------------------------------------------------------------------------------------------------------------------------------------------------------------------------------------------------------------------------------------------------------------------------------------------------------------------------------------------------------------------------------------|
| <b>Methods</b>       | <p>Location: Chungbuk National University Hospital</p> <p>Design: Prospective randomized comparison trial</p> <p>Method of randomisation: Table of random numbers</p> <p>Assessor blinding: Not mentioned</p> <p>Study period: Not mentioned</p> <p>Follow-up: More than 2 years</p> <p>Intention-to-treat: Assumed a 20% withdrawal rate preoperation and analyzed data when each group had 25 eligible patients.</p>                                                                                                                                                                                                                                                                                                                                                                                                                                                                                                                                                                                                                                                                          |
| <b>Participants</b>  | <p>Single anchor group: 6 patients had osteochondral lesions of the talus, 5 had anterior soft tissue impingement syndrome, 2 had anterior bony impingement, and 2 had loose bodies</p> <p>Double anchor group: 4 patients had osteochondral lesions of the talus, 8 had anterior soft tissue impingement syndrome, and 1 had loose bodie</p> <p>Inclusion criteria (1+2+3/4):</p> <p>(1) patients who complained of subjective instability of the ankle joint in whom repeated sprain injuries for more than 6 months and pain were confirmed;</p> <p>(2) patients with marked ankle instability confirmed by the anterior drawer test compared with the contralateral ankle and tenderness involving the lateral ligaments of the ankle confirmed on physical examination;</p> <p>(3) patients with a talar tilt angle exceeding 10 degrees or a discrepancy of more than 5 degrees compared with the non-affected side on stress radiography;</p> <p>(4) patients with an anterior talar translation exceeding 10 mm or a discrepancy more than 3 mm compared with the nonaffected side.</p> |
| <b>Interventions</b> | <p>a) Single anchor group: Modified Brostrom procedure with a single Corkscrew for repairment of the anterolateral ankle ligaments</p> <p>b) Double anchor group: Modified Brostrom procedure with 2 Corkscrew for repairment of the anterolateral ankle ligaments</p> <p>Both groups underwent the same post-operative rehabilitation programme</p> <p>Mean length of follow-up: 30.2 (range 24 to 36) months in the single anchor group and 29.8 (range 24 to 34) months in the double anchor group</p>                                                                                                                                                                                                                                                                                                                                                                                                                                                                                                                                                                                       |
| <b>Outcomes</b>      | <p>(1) Karlsson score</p> <p>(2) Sefton grading system</p> <p>(3) Anterior talar translation and talar tilt angle (preoperative and postoperative)</p> <p>(4) Postoperative complications: wound complications, nerve damage, ganglion, device breakage / pull-out / migration.</p>                                                                                                                                                                                                                                                                                                                                                                                                                                                                                                                                                                                                                                                                                                                                                                                                             |
| <b>Notes</b>         |                                                                                                                                                                                                                                                                                                                                                                                                                                                                                                                                                                                                                                                                                                                                                                                                                                                                                                                                                                                                                                                                                                 |

#### Risk of bias table

| Bias                                                      | Authors' judgement | Support for judgement                                              |
|-----------------------------------------------------------|--------------------|--------------------------------------------------------------------|
| Random sequence generation (selection bias)               | Low risk           | Patients were randomly assigned based on a table of random numbers |
| Allocation concealment (selection bias)                   | Unclear risk       | Allocation concealment not mentioned                               |
| Blinding of participants and personnel (performance bias) | Unclear risk       | Blinding not mentioned                                             |

|                                                 |              |                                                                                 |
|-------------------------------------------------|--------------|---------------------------------------------------------------------------------|
| Blinding of outcome assessment (detection bias) | Unclear risk | Blinding not mentioned                                                          |
| Incomplete outcome data (attrition bias)        | Low risk     | Assumed withdrawal rate preoperation, probably no data lost                     |
| Selective reporting (reporting bias)            | Low risk     | Outcome measures the same in methods and results sections                       |
| Other bias                                      | Unclear risk | There was insufficient information to judge the risk from other sources of bias |

*Footnotes*
