# Supplementary material for: Surgical management of chronic lateral ankle instability: a meta-analysis
Source: PubMed Central journal article supplement (PMC6019311; doi:10.1186/s13018-018-0870-6), 2018-06-25
Supplement: 13018_2018_870_MOESM4_ESM.pdf [file 13018_2018_870_MOESM4_ESM.pdf]

# Characteristics of studies

## Characteristics of included studies

### Henrikus 1996

|                      |                                                                                                                                                                                                                                                                                                                                                                                                                                                                                                                                                                                                                                                                           |
|----------------------|---------------------------------------------------------------------------------------------------------------------------------------------------------------------------------------------------------------------------------------------------------------------------------------------------------------------------------------------------------------------------------------------------------------------------------------------------------------------------------------------------------------------------------------------------------------------------------------------------------------------------------------------------------------------------|
| <b>Methods</b>       | <p>Location: Department of Orthopaedic Surgery and Clinical Investigation, Naval Hospital</p> <p>Design: Randomised controlled trial</p> <p>Method of randomisation: Numbered envelopes with random allocated numbers</p> <p>Assessor blinding: Not mentioned</p> <p>Study period: July 1989 to August 1992</p> <p>Follow-up: Mean 29 months, range 6 to 49 months</p> <p>Loss to follow-up: Two patients lost to follow-up for the final evaluation, not analysed</p>                                                                                                                                                                                                    |
| <b>Participants</b>  | <p>40 participants, 42 ankles, 4 females and 36 males, mean age 26 years (range 19 to 37)</p> <p>Inclusion criteria:</p> <ol style="list-style-type: none"> <li>(1) skeletal maturity</li> <li>(2) history of significant ankle injury followed by episodes of giving way for at least 6 months</li> <li>(3) positive anterior drawer test on physical examination</li> </ol> <p>Exclusion criteria:</p> <ol style="list-style-type: none"> <li>(1) Generalized ligamentous laxity disorder;</li> <li>(2) Radiographic arthritis or tarsal coalition on radiographs;</li> <li>(3) Previous ankle surgery</li> </ol> <p>Loss to follow-up: Two in Chrisman-Snook group</p> |
| <b>Interventions</b> | <p>Two methods of ankle ligament reconstruction:</p> <ol style="list-style-type: none"> <li>(1) Chrisman-Snook procedure</li> <li>(2) Modified-Brostrom procedure</li> </ol> <p>Assigned: 20 (all males) / 20 (male 16, female 4)</p> <p>Analysed: short term outcomes: 20 / 20, long term outcomes: 18 / 20</p> <p>Physical examination and radiographs: 9 / 10</p>                                                                                                                                                                                                                                                                                                      |
| <b>Outcomes</b>      | <ol style="list-style-type: none"> <li>(1) Sefton score</li> <li>(2) Residual instability, pain and swelling</li> <li>(3) Radiographic stability: Anterior talar translation and talar tilt</li> <li>(4) Postoperative complications: wound infection, nerve damage, stiffness, subsequent sprains, non-return to previous activity</li> </ol>                                                                                                                                                                                                                                                                                                                            |
| <b>Notes</b>         |                                                                                                                                                                                                                                                                                                                                                                                                                                                                                                                                                                                                                                                                           |

### Risk of bias table

| Bias                                                      | Authors' judgement | Support for judgement                                                                 |
|-----------------------------------------------------------|--------------------|---------------------------------------------------------------------------------------|
| Random sequence generation (selection bias)               | Low risk           | Numbered envelopes with randomly allocated assignments                                |
| Allocation concealment (selection bias)                   | Unclear risk       | Numbered envelopes used, further concealment protection not mentioned                 |
| Blinding of participants and personnel (performance bias) | High risk          | Blinding not mentioned                                                                |
| Blinding of outcome assessment (detection bias)           | High risk          | Blinding not mentioned                                                                |
| Incomplete outcome data (attrition bias)                  | Unclear risk       | Two patients lost to final follow-up in Chrisman-Snook group. Lost data not mentioned |

---

|                                      |              |                                                                                                  |
|--------------------------------------|--------------|--------------------------------------------------------------------------------------------------|
| Selective reporting (reporting bias) | High risk    | Not all outcome measures mentioned in the results selection are described in the methods section |
| Other bias                           | Unclear risk | There was not sufficient information to judge the risk from other sources of bias.               |

*Footnotes*
