# Supplementary material for: Surgical management of chronic lateral ankle instability: a meta-analysis
Source: PubMed Central journal article supplement (PMC6019311; doi:10.1186/s13018-018-0870-6), 2018-06-25
Supplement: 13018_2018_870_MOESM5_ESM.pdf [file 13018_2018_870_MOESM5_ESM.pdf]

# Characteristics of studies

## Characteristics of included studies

### Karlsson 1997

|                      |                                                                                                                                                                                                                                                                                                                                                                                                                                                                                                                                                                                          |
|----------------------|------------------------------------------------------------------------------------------------------------------------------------------------------------------------------------------------------------------------------------------------------------------------------------------------------------------------------------------------------------------------------------------------------------------------------------------------------------------------------------------------------------------------------------------------------------------------------------------|
| <b>Methods</b>       | <p>Location: Ostra Hospital, Goteborg, Sweden</p> <p>Design: Prospective randomized study</p> <p>Method of randomisation: Closed envelopes with the group assignment</p> <p>Assessor blinding: Not mentioned</p> <p>Study period: 1989 to 1992</p> <p>Follow-up: Mean 3.1 / 3.3 years, range 2 to 5 years in both groups</p> <p>Intention-to-treat: Complete follow-up</p>                                                                                                                                                                                                               |
| <b>Participants</b>  | <p>60 participants, 42 men and 18 women, mean age of 24 years (range, 17 to 36)</p> <p>Inclusion criteria:</p> <p>(1) Chronic ankle instability for more than 6 months</p> <p>(2) Pre-operative supervised rehabilitation programme without success</p> <p>(3) Radiographic measurements: difference in anterior talar translation of <math>\geq 3</math> mm or talar tilt <math>\geq 3^\circ</math> compared with the contralateral side</p> <p>Loss to follow-up: No patients lost.</p>                                                                                                |
| <b>Interventions</b> | <p>(1) Group I : Anatomic repairment of the lateral ankle ligaments by transosseous suture, viewed as a type of Modified Brostrom procedure.</p> <p>(2) Group II : Anatomic repairment of the lateral ankle ligaments by imbrication and with inferior extensor retinaculum reinforcement, Modified Brostrom procedure.</p> <p>Both groups underwent the same post-operative rehabilitation programme.</p> <p>Assigned: 30/30</p> <p>Analysed: 30/30 (Two patients, one in each group, both with excellent functional results, didn't participate radiologic follow-up examination.)</p> |
| <b>Outcomes</b>      | <p>(1) Operation time</p> <p>(2) Karlsson score (excellent: 91-100; good: 81-90; fair: 61-80; poor: &lt;60)</p> <p>(3) Radiographic stability: Anterior talar translation and talar tilt</p> <p>(4) Postoperative complications: wound infection, nerve damage</p>                                                                                                                                                                                                                                                                                                                       |
| <b>Notes</b>         |                                                                                                                                                                                                                                                                                                                                                                                                                                                                                                                                                                                          |

### Risk of bias table

| Bias                                                      | Authors' judgement | Support for judgement                                                                                                                            |
|-----------------------------------------------------------|--------------------|--------------------------------------------------------------------------------------------------------------------------------------------------|
| Random sequence generation (selection bias)               | Low risk           | Closed envelopes with the group assignment before surgery                                                                                        |
| Allocation concealment (selection bias)                   | Unclear risk       | Envelopes used, but further concealment protection not mentioned                                                                                 |
| Blinding of participants and personnel (performance bias) | Unclear risk       | Blinding not mentioned                                                                                                                           |
| Blinding of outcome assessment (detection bias)           | Unclear risk       | Blinding not mentioned                                                                                                                           |
| Incomplete outcome data (attrition bias)                  | Low risk           | Two patients, one in each group, both with excellent functional results, didn't participate radiologic follow-up examination, data not analysed. |
| Selective reporting (reporting bias)                      | High risk          | Additional outcome measure used but not described in the method section                                                                          |
| Other bias                                                | Unclear risk       | There was insufficient information to judge the risk from other sources of bias.                                                                 |
