# Supplementary material for: Surgical management of chronic lateral ankle instability: a meta-analysis
Source: PubMed Central journal article supplement (PMC6019311; doi:10.1186/s13018-018-0870-6), 2018-06-25
Supplement: 13018_2018_870_MOESM6_ESM.pdf [file 13018_2018_870_MOESM6_ESM.pdf]

# Characteristics of studies

## Characteristics of included studies

### Larsen 1990

|                      |                                                                                                                                                                                                                                                                                                                                                                                                                                                                                                                                                                                                                                                                                          |
|----------------------|------------------------------------------------------------------------------------------------------------------------------------------------------------------------------------------------------------------------------------------------------------------------------------------------------------------------------------------------------------------------------------------------------------------------------------------------------------------------------------------------------------------------------------------------------------------------------------------------------------------------------------------------------------------------------------------|
| <b>Methods</b>       | <p>Location: University of Copenhagen</p> <p>Design: Prospective randomised trial</p> <p>Method of randomisation: Enclosed slip designated the treatment by use of Geigy's random numbers</p> <p>Assessor blinding: Radiographic evaluation at follow-up was blinded</p> <p>Study period: 1980 to 1985</p> <p>Follow-up: Mean 25 months, range 18 to 38 months</p> <p>Intention-to-treat: No, 17 individuals in the dynamic repair group were excluded and not analysed, leaving 26 individuals for comparison.</p>                                                                                                                                                                      |
| <b>Participants</b>  | <p>99 patients with 108 ankles were treated, only 82 patients (89 ankles) were included for comparison</p> <p>46 man and 36 women, age range 17 to 49 years</p> <p>Inclusion criteria:</p> <ol style="list-style-type: none"> <li>(1) Recurring giving way of the ankle without improvement after conservative treatment</li> <li>(2) Manual and radiographic mechanical ankle instability</li> </ol> <p>Exclusion criteria:</p> <ol style="list-style-type: none"> <li>(1) Peroneus brevis tendon was too thin for splitting in operation</li> <li>(2) Patients with open epiphyses</li> </ol> <p>Loss to follow-up: 82 patients included for analysis, none were lost to follow-up</p> |
| <b>Interventions</b> | <ol style="list-style-type: none"> <li>(1) Dynamic tenodesis: the distal peroneus brevis tendon is split and the anterior part is used for a dynamic repairment</li> <li>(2) Static tenodesis: the whole thickness of distal peroneus brevis tendon is used to make an static repairment of lateral ankle ligaments</li> </ol> <p>Both groups underwent the same postoperative rehabilitation programme</p> <p>Assigned: 99 participants (108 ankles): 43 participants (48 ankles) / 56 participants (60 ankles)</p> <p>Analysed: 82 participants (89 ankles): 26 participants (29 ankles) / 56 participants (60 ankles)</p>                                                             |
| <b>Outcomes</b>      | <ol style="list-style-type: none"> <li>(1) Evaluation scheme of the results: A 12 point score with 3 items: pain, degree of instability and decrease in strength was used for clinical assessment</li> <li>(2) Functional balance: Ability to stand on one forefoot for ten seconds</li> <li>(3) Mechanical stability by roentgenograms</li> <li>(4) Postoperative complications: Nerve damage, DVT, ankle swelling, subsequent sprains, revision</li> <li>(5) Postoperative sports activity</li> </ol>                                                                                                                                                                                  |
| <b>Notes</b>         |                                                                                                                                                                                                                                                                                                                                                                                                                                                                                                                                                                                                                                                                                          |

### Risk of bias table

| Bias                                                      | Authors' judgement | Support for judgement                                                   |
|-----------------------------------------------------------|--------------------|-------------------------------------------------------------------------|
| Random sequence generation (selection bias)               | Low risk           | Enclosed slip designated the treatment by use of Geigy's random numbers |
| Allocation concealment (selection bias)                   | Unclear risk       | Envelopes used, but further concealment protection not mentioned        |
| Blinding of participants and personnel (performance bias) | Unclear risk       | Blinding of participants not mentioned                                  |

|                                                 |              |                                                                                                  |
|-------------------------------------------------|--------------|--------------------------------------------------------------------------------------------------|
| Blinding of outcome assessment (detection bias) | Low risk     | Radiographic evaluation at follow-up was blinded                                                 |
| Incomplete outcome data (attrition bias)        | High risk    | Patients after randomisation excluded and not analysed                                           |
| Selective reporting (reporting bias)            | High risk    | A second publication with other outcome measures of the same study population has been published |
| Other bias                                      | Unclear risk | There was insufficient information to judge the risk from other sources of bias.                 |

*Footnotes*
