# Supplementary material for: Surgical management of chronic lateral ankle instability: a meta-analysis
Source: PubMed Central journal article supplement (PMC6019311; doi:10.1186/s13018-018-0870-6), 2018-06-25
Supplement: 13018_2018_870_MOESM8_ESM.pdf [file 13018_2018_870_MOESM8_ESM.pdf]

## Characteristics of studies

### Characteristics of included studies

#### Rosenbaum 1999

|                      |                                                                                                                                                                                                                                                                                                                                                              |
|----------------------|--------------------------------------------------------------------------------------------------------------------------------------------------------------------------------------------------------------------------------------------------------------------------------------------------------------------------------------------------------------|
| <b>Methods</b>       | Location: Westfälische Wilhelms-Universität Münster<br>Design: Randomised trial<br>Method of randomisation: Not mentioned<br>Assessor blinding: Not mentioned<br>Study period: Not mentioned<br>Follow-up: 10±4 months<br>Loss to follow-up: Not mentioned, complete follow-up                                                                               |
| <b>Participants</b>  | 10 participants in each group, all male, mean age 25 years<br>Inclusion criteria:<br>(1) Recurrent inversion injuries and pain in the ankle joint<br>(2) Radiological stress examination resulted in a talar tilt of more than 10° or in an anterior drawer sign of more than 10 mm<br>Exclusion criteria: Not mentioned<br>Loss to follow-up: Not mentioned |
| <b>Interventions</b> | (1) Evans group: Modified Evans tenodesis was used for reconstruction of the anterolateral ankle ligaments<br>(2) Periost group: Anatomic repairment of the anterolateral ankle ligaments with reinforcement with a periosteal flap<br>Both groups underwent the same post-operative rehabilitation programme<br>Assigned: 10/10<br>Analysed: 10/10          |
| <b>Outcomes</b>      | (1) Physical examination with manual evaluation of joint mobility<br>(2) Radiographic stress diagnostics in neutral ankle position with talar tilt, and anterior drawer measurements under a load application.                                                                                                                                               |
| <b>Notes</b>         |                                                                                                                                                                                                                                                                                                                                                              |

#### Risk of bias table

| Bias                                                      | Authors' judgement | Support for judgement                                                                                                       |
|-----------------------------------------------------------|--------------------|-----------------------------------------------------------------------------------------------------------------------------|
| Random sequence generation (selection bias)               | Unclear risk       | The patients were assigned to one of two experimental groups after stratified randomization but no further details provided |
| Allocation concealment (selection bias)                   | Unclear risk       | Allocation concealment not mentioned                                                                                        |
| Blinding of participants and personnel (performance bias) | High risk          | Blinding not mentioned                                                                                                      |
| Blinding of outcome assessment (detection bias)           | High risk          | Blinding not mentioned                                                                                                      |
| Incomplete outcome data (attrition bias)                  | Low risk           | There was no loss to follow-up                                                                                              |
| Selective reporting (reporting bias)                      | Low risk           | Outcome measures the same in methods and results sections                                                                   |
| Other bias                                                | Unclear risk       | There was insufficient information to judge the risk from other sources of bias                                             |
