# Supplementary material for: Surgical management of chronic lateral ankle instability: a meta-analysis
Source: PubMed Central journal article supplement (PMC6019311; doi:10.1186/s13018-018-0870-6), 2018-06-25
Supplement: 13018_2018_870_MOESM9_ESM.pdf [file 13018_2018_870_MOESM9_ESM.pdf]

---

## Characteristics of studies

### Characteristics of excluded studies

#### *Axelsen 1993*

|                      |                              |
|----------------------|------------------------------|
| Reason for exclusion | No clinical outcome measures |
|----------------------|------------------------------|

#### *Beynon 2005*

|                      |                 |
|----------------------|-----------------|
| Reason for exclusion | Diagnosis study |
|----------------------|-----------------|

#### *Burks 1991*

|                      |                  |
|----------------------|------------------|
| Reason for exclusion | Prevention study |
|----------------------|------------------|

#### *Cesarone 2008*

|                      |                                       |
|----------------------|---------------------------------------|
| Reason for exclusion | About patients with vascular diseases |
|----------------------|---------------------------------------|

#### *Chan 2009*

|                      |                                     |
|----------------------|-------------------------------------|
| Reason for exclusion | Not about chronic ankle instability |
|----------------------|-------------------------------------|

#### *De Vries 2006*

|                      |        |
|----------------------|--------|
| Reason for exclusion | Review |
|----------------------|--------|

#### *Derksen 2005*

|                      |                 |
|----------------------|-----------------|
| Reason for exclusion | Diagnosis study |
|----------------------|-----------------|

#### *Derksen 2015*

|                      |                 |
|----------------------|-----------------|
| Reason for exclusion | Diagnosis study |
|----------------------|-----------------|

#### *Docherty 2004*

|                      |                                  |
|----------------------|----------------------------------|
| Reason for exclusion | Electromyography and kinesiology |
|----------------------|----------------------------------|

#### *Doeringer 2010*

|                      |                         |
|----------------------|-------------------------|
| Reason for exclusion | Non-operative treatment |
|----------------------|-------------------------|

#### *Faber 2004*

|                      |                                     |
|----------------------|-------------------------------------|
| Reason for exclusion | Not about chronic ankle instability |
|----------------------|-------------------------------------|

#### *Giza 2013*

|                      |               |
|----------------------|---------------|
| Reason for exclusion | Cadaver study |
|----------------------|---------------|

#### *Hayman 2010*

|                      |                  |
|----------------------|------------------|
| Reason for exclusion | Prevention study |
|----------------------|------------------|

---

### ***Hupperets 2010***

|                      |                       |
|----------------------|-----------------------|
| Reason for exclusion | Cost-Benefit analysis |
|----------------------|-----------------------|

### ***Janssen 2014***

|                      |                       |
|----------------------|-----------------------|
| Reason for exclusion | Cost-Benefit analysis |
|----------------------|-----------------------|

### ***Johannes 1993***

|                      |                         |
|----------------------|-------------------------|
| Reason for exclusion | Non-operative treatment |
|----------------------|-------------------------|

### ***Johnson 2007***

|                      |                 |
|----------------------|-----------------|
| Reason for exclusion | Diagnosis study |
|----------------------|-----------------|

### ***Konradsen 1999***

|                      |        |
|----------------------|--------|
| Reason for exclusion | Review |
|----------------------|--------|

### ***Munk 1995***

|                      |                        |
|----------------------|------------------------|
| Reason for exclusion | Patients not randomize |
|----------------------|------------------------|

### ***Okcu 2006***

|                      |                     |
|----------------------|---------------------|
| Reason for exclusion | Non-operative study |
|----------------------|---------------------|

### ***Pijnenburg 2003***

|                      |                                         |
|----------------------|-----------------------------------------|
| Reason for exclusion | Operative versus conservative treatment |
|----------------------|-----------------------------------------|

### ***Povacz 1998***

|                      |                                         |
|----------------------|-----------------------------------------|
| Reason for exclusion | Operative versus conservative treatment |
|----------------------|-----------------------------------------|

### ***Schuh 2016***

|                      |               |
|----------------------|---------------|
| Reason for exclusion | Cadaver study |
|----------------------|---------------|

### ***Van Reijen 2014***

|                      |                              |
|----------------------|------------------------------|
| Reason for exclusion | Prevention of ankle injuries |
|----------------------|------------------------------|

### ***Zwipp 1991***

|                      |                                         |
|----------------------|-----------------------------------------|
| Reason for exclusion | Operative versus conservative treatment |
|----------------------|-----------------------------------------|

### ***Zwipp 1992***

|                      |                                         |
|----------------------|-----------------------------------------|
| Reason for exclusion | Operative versus conservative treatment |
|----------------------|-----------------------------------------|

*Footnotes*
